# Supplementary material for: Electrochemistry and energy conversion features of protonic ceramic cells with mixed ionic-electronic electrolytes
Source: Royal Society of Chemistry journal article supplement (doi:10.1039/d1ee03109k), 2021-11-10
Supplement: d1ee03109k1.pdf [file d1ee03109k1.pdf]

## Supplementary materials

### Electrochemistry and energy conversion features of protonic ceramic cells with mixed ionic-electronic electrolytes

Inna A. Zvonareva<sup>a,b</sup> , Xian-Zhu Fu<sup>c</sup> ,  
Dmitry A. Medvedev<sup>a,b,\*</sup> , Zongping Shao<sup>d,e,\*</sup> 

<sup>a</sup> Laboratory of Electrochemical Devices Based on Solid Oxide Proton Electrolytes, Institute of High Temperature Electrochemistry, 620137 Yekaterinburg, Russia

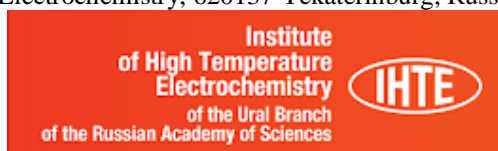

<sup>b</sup> Ural Federal University, 620002 Yekaterinburg, Russia

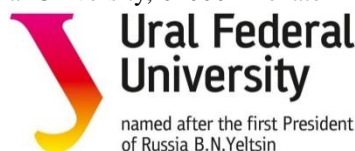

<sup>c</sup> College of Materials Science and Engineering, Shenzhen University, Shenzhen, 518055, China

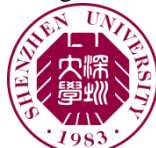

<sup>d</sup> State Key Laboratory of Materials-Oriented Chemical Engineering, College of Chemical Engineering, Nanjing Tech University, Nanjing 210009, China

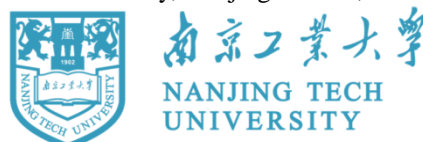

<sup>e</sup> WA School of Mines: Minerals, Energy and Chemical Engineering, Curtin University, Perth, Western Australia 6845, Australia

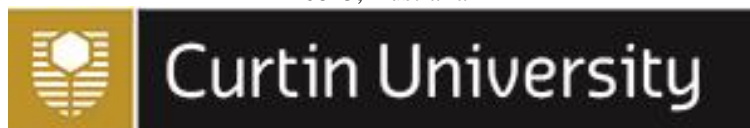

\* Corresponding authors: D. Medvedev, [dmitrymedv@mail.ru](mailto:dmitrymedv@mail.ru); Z. Shao, [shaozp@njtech.edu.cn](mailto:shaozp@njtech.edu.cn)

**This file includes:  
4 Figures**

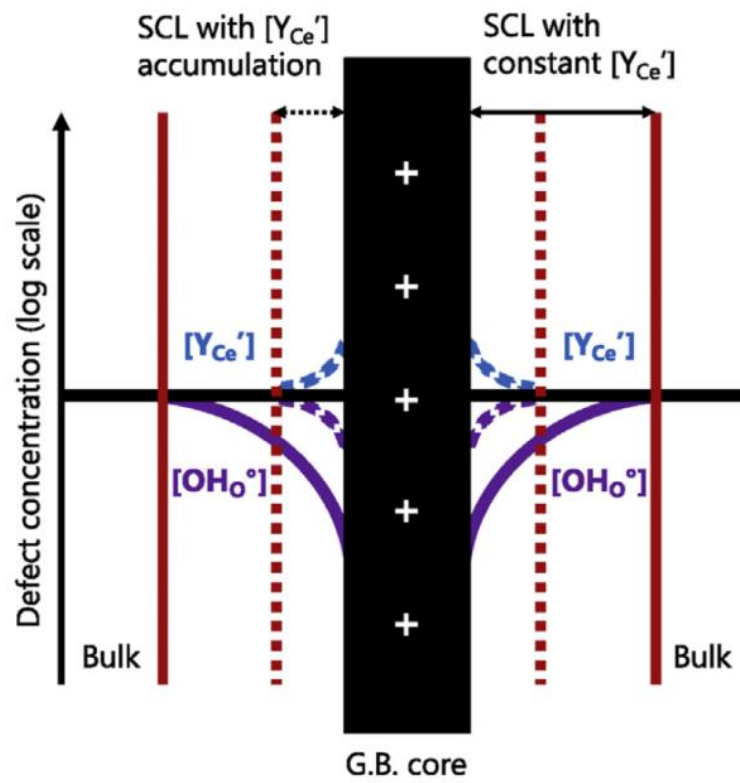

**Figure S1.** Schematic space charge layer model for proton-conducting ceramic materials.<sup>1</sup>

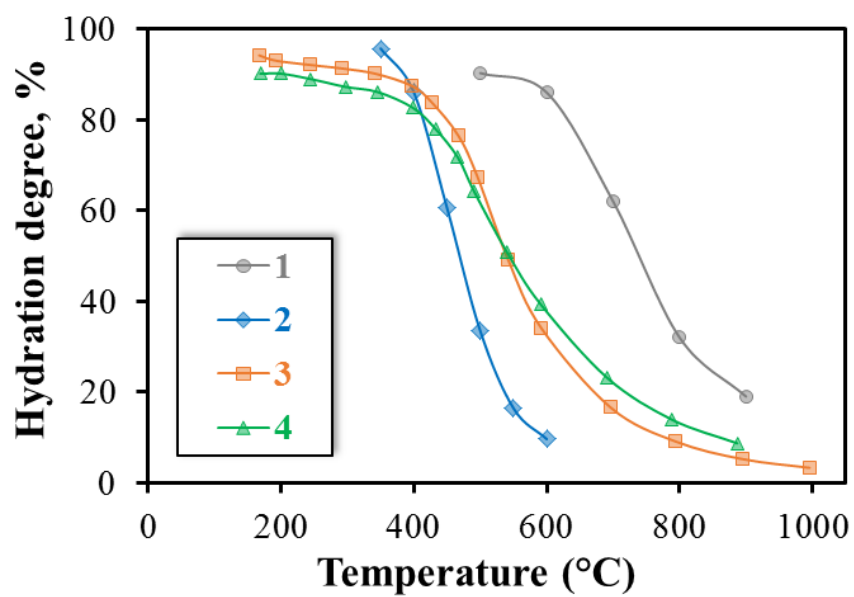

**Figure S2.** Hydration capability of BaCeO<sub>3</sub>- and BaZrO<sub>3</sub>-based ceramic materials: 1 – BaCe<sub>0.9</sub>Y<sub>0.1</sub>O<sub>3-δ</sub>,<sup>2</sup> 2 – BaCe<sub>0.9</sub>Y<sub>0.1</sub>O<sub>3-δ</sub>,<sup>3</sup> 3 – BaZr<sub>0.4</sub>Sc<sub>0.6</sub>O<sub>3-δ</sub>,<sup>4</sup> 4 – BaZr<sub>0.8</sub>Sc<sub>0.2</sub>O<sub>3-δ</sub>.<sup>4</sup>

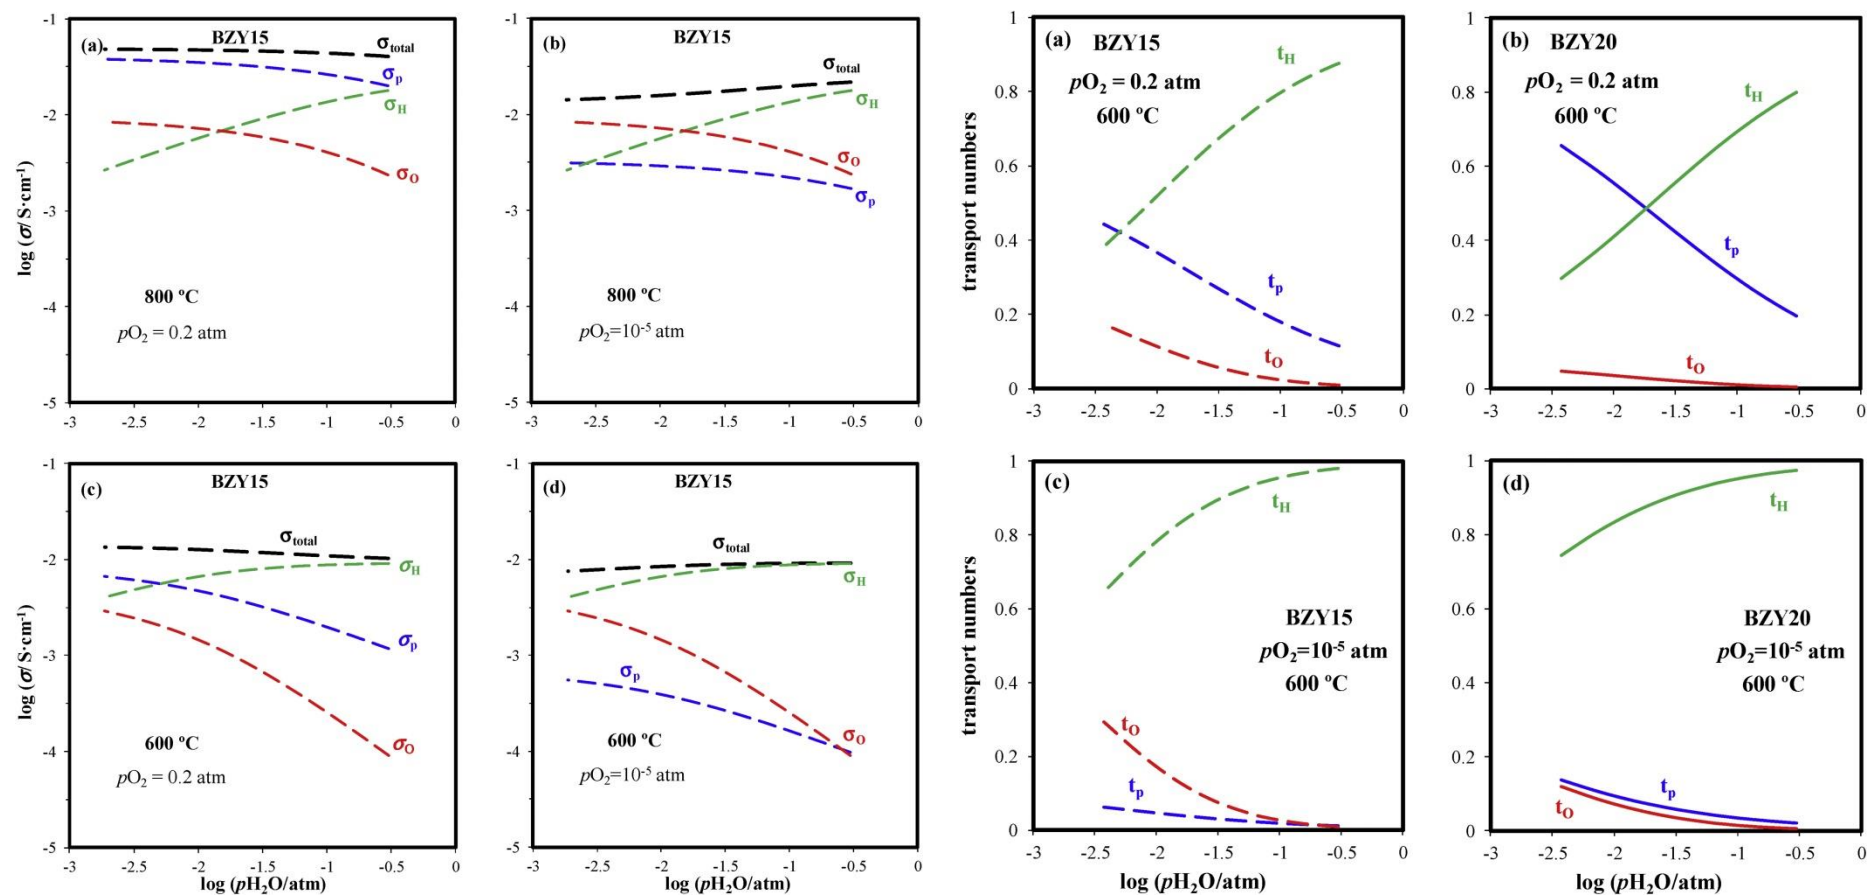

**Figure S3.** Dependences of total and partial conductivities of oxide ions, protons and electron holes, as well as the corresponding transference numbers for  $\text{BaZr}_{0.8}\text{Y}_{0.2}\text{O}_{3-\delta}$  as a function of  $p\text{H}_2\text{O}$  at different  $T$  and  $p\text{O}_2$  values.<sup>5</sup>

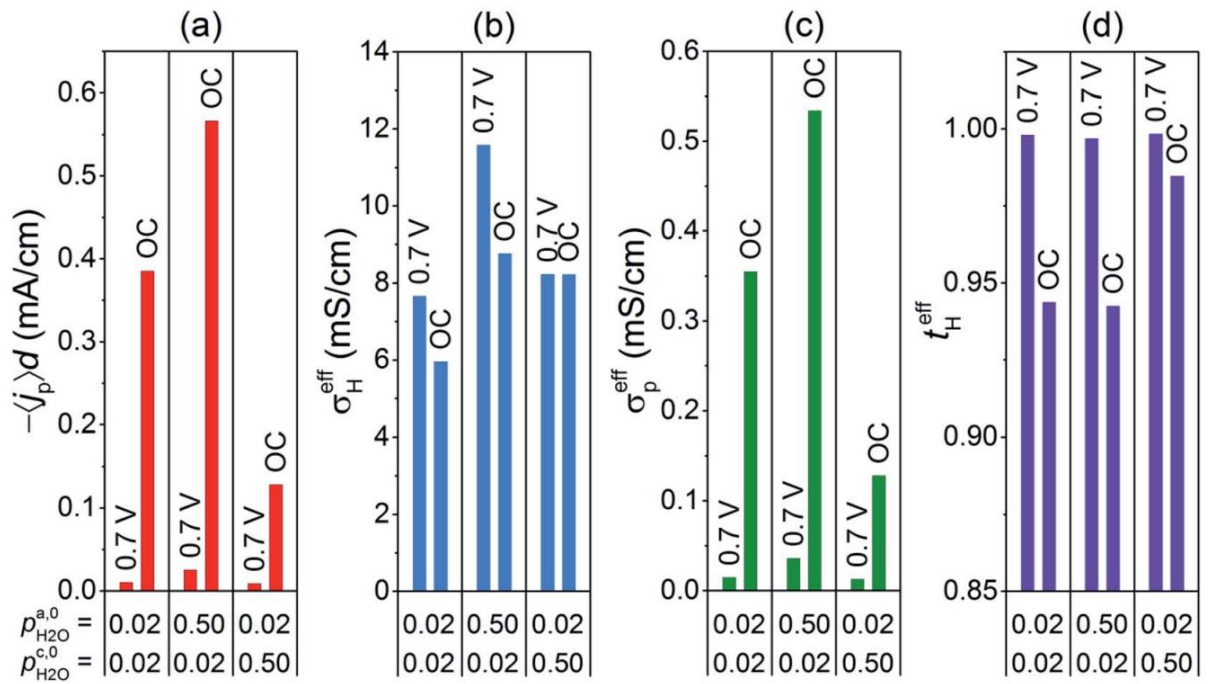

**Figure S4.** Comparison of the fuel cell parameters calculated under different operating conditions:<sup>6</sup> (a) p-type electronic current density; (b) effective proton conductivity; (c) effective hole conductivity; (d) effective proton transference number.

## References

- 1 F. J. A. Loureiro, Z. Shakel, V. C. D. Graça, D. P. Fagg, *International Journal of Hydrogen Energy*, 2021, **46**, 23828–23838. <https://doi.org/10.1016/J.IJHYDENE.2021.04.175>.
- 2 M. Oishi, S. Akoshima, K. Yashiro, K. Sato, J. Mizusaki, T. Kawada, *Solid State Ionics*, 2009, **180**, 127–131. <https://doi.org/10.1016/J.SSI.2008.12.025>.
- 3 F. J. A. Loureiro, D. Pérez-Coll, V. C. D. Graça, S. M. Mikhalev, A. F. G. Ribeiro, A. Mendes, D. P. Fagg, *Journal of Materials Chemistry A*, 2019, **7**, 18135–18142. <https://doi.org/10.1039/C9TA04584H>.
- 4 J. Hyodo, K. Kitabayashi, K. Hoshino, Y. Okuyama, Y. Yamazaki, *Advanced Energy Materials*, 2020, **10**, 2000213. <https://doi.org/10.1002/aenm.202000213>.
- 5 I. Antunes, D. Pérez-Coll, N. Nasani, H. S. Soares, G. C. Mather, J. R. Frade, D. P. Fagg, *International Journal of Hydrogen Energy*, 2021, **46**, 13606–13621. <https://doi.org/10.1016/J.IJHYDENE.2020.06.222>.
- 6 L. P. Putilov, V. I. Tsidilkovski, A. K. Demin. *Journal of Materials Chemistry A*, 2020, **8**, 12641–12656. <https://doi.org/10.1039/D0TA03935G>.
